# Supplementary material for: Training Community Health Workers to Manage Uncomplicated and Severe Malaria: Experience From 3 Rural Malaria-Endemic Areas in Sub-Saharan Africa
Source: PubMed Central journal article supplement (PMC5146696; doi:10.1093/cid/ciw624), 2016-12-06
Supplement: supp_ciw624_ciw624supp.pdf [file supp_ciw624_ciw624supp.pdf]

**Supplementary Table 1:** Training models and topics covered in Burkina Faso

| Who was trained and job description                                             | Trainers                                     | Duration of the training | Content of training                                                                                                                                                                                                                                                                                                                                                                                                                                                                                                                                                                                                                                                                                                | Supervisors                                 |
|---------------------------------------------------------------------------------|----------------------------------------------|--------------------------|--------------------------------------------------------------------------------------------------------------------------------------------------------------------------------------------------------------------------------------------------------------------------------------------------------------------------------------------------------------------------------------------------------------------------------------------------------------------------------------------------------------------------------------------------------------------------------------------------------------------------------------------------------------------------------------------------------------------|---------------------------------------------|
| Nurses                                                                          |                                              |                          | <ul style="list-style-type: none"> <li>· Signs and symptoms of uncomplicated and severe malaria</li> <li>· Identification of eligible patients for uncomplicated malaria treatment and differentiation of patients to be treated with oral drugs vs those to be treated with rectal artesunate</li> <li>· Obtaining informed consent from parent/ guardian</li> </ul>                                                                                                                                                                                                                                                                                                                                              |                                             |
| Train and supervise community health workers                                    | Investigative team* and district health team | Two days                 | <ul style="list-style-type: none"> <li>· Use of RDTs and interpretation of results</li> <li>· Counting respiratory rates</li> <li>· Measuring temperature</li> <li>· Administration of treatment</li> <li>· Referral of patients with danger signs to health centres</li> <li>· Follow – up of each RA treated patient</li> <li>· Record keeping and bookkeeping</li> <li>· Adverse events reporting</li> <li>· Monitoring and supervision</li> <li>· Conduct of educational talks</li> </ul>                                                                                                                                                                                                                      | –                                           |
| Drugs store manager                                                             |                                              |                          | <ul style="list-style-type: none"> <li>· Signs and symptoms of uncomplicated malaria and severe malaria</li> <li>· Identification of danger signs</li> <li>· Obtaining informed consent from parent/ guardian</li> <li>· Use of RDTs and interpretation of results</li> <li>· Counting respiratory rates</li> </ul>                                                                                                                                                                                                                                                                                                                                                                                                |                                             |
| Drugs storage, drugs distribution to community health workers, records keeping. | Nurses                                       | Three days               | <ul style="list-style-type: none"> <li>· Measuring temperature</li> <li>· Administration of treatment</li> <li>· Referral of patients with danger signs to health centres</li> <li>· Follow – up of each RA treated patient</li> <li>· Record keeping and book keeping</li> <li>· Adverse events reporting</li> <li>· Use of Pictorials for CCC</li> </ul>                                                                                                                                                                                                                                                                                                                                                         | Investigative team and district health team |
| Community health workers                                                        | Nurses                                       | Three days               | <ul style="list-style-type: none"> <li>· Signs and symptoms of uncomplicated malaria and severe malaria</li> <li>· Identification of danger signs</li> <li>· Obtaining informed consent from parent/ guardian</li> <li>· Use of RDTs and interpretation of results</li> <li>· Counting respiratory rates</li> <li>· Measuring temperature</li> <li>· Administration of treatment</li> <li>· Referral of patients with danger signs to health centres</li> <li>· Follow – up of each RA treated patient</li> <li>· Record keeping and book keeping</li> <li>· Adverse events reporting</li> <li>· Counselling of caregivers</li> <li>· Use of Pictorials for IEC</li> <li>· Conduct of educational talks</li> </ul> | Investigative team and district health team |

\*The investigative team was multidisciplinary composed of physicians, medical biologist, socio – anthropologists and epidemiologist

**Supplementary Table 2:** Training models and topics covered in Nigeria

| <b>Who was trained and job description</b> | <b>Trainers</b>                              | <b>Duration of the training</b> | <b>Content of training</b>                                                                                                                                                                                                                                                                                                                                                        |
|--------------------------------------------|----------------------------------------------|---------------------------------|-----------------------------------------------------------------------------------------------------------------------------------------------------------------------------------------------------------------------------------------------------------------------------------------------------------------------------------------------------------------------------------|
| Training of Community health workers       | Investigative team* and district health team | 3 days                          | Causes of fever<br>Malaria (causes & transmission)<br>Signs & symptoms of UC/severe malaria<br>Practical session on use of RDTs<br>Presumptive diagnosis vs. RDT<br>Preparation of thick blood smears<br>Record keeping<br>Completion of registers<br>Other data collection tools<br>Case management & referral<br>Communication skills/ethics<br>Accountability for drugs & RDTs |

\* specialists in epidemiology, clinical pharmacology, clinical, medical sociology, anthropology, health education, laboratory techniques and environment health

**Supplementary Table 3:** Training models and topics covered in Uganda

| Who was trained and job description          | Trainers                                               | Duration of the training | Content of training                                                                                                                                                                                                                                                                                                                                                                                                                                                                                 |
|----------------------------------------------|--------------------------------------------------------|--------------------------|-----------------------------------------------------------------------------------------------------------------------------------------------------------------------------------------------------------------------------------------------------------------------------------------------------------------------------------------------------------------------------------------------------------------------------------------------------------------------------------------------------|
| ICCM workshop of<br>Community health workers | Investigative<br>team** and<br>district health<br>team | Five days                | Role of the CHW<br>Clinical practice: Asking the caregiver about the child’s problems<br>Identify fast breathing<br>Identify danger signs<br>Referring a sick child or new born to a health facility<br>Clinical practice for assessment, classification, referral<br>RDT use and interpretaion<br>Introduction to the study on follow up of children<br>Treat child with no danger signs<br>Treat fever, cough, diarrhoea<br>Pre-referral treatment<br>Routine newborn care<br>Medicine management |

\* total 234 CHWs passed the post training test but not all of them became really active study CHWs

\*\* The investigative team was composed of physicians, socio – anthropologists and epidemiologists

**Supplementary Table 4:** List of variables and indicators assessed

| Objectives         | Variables                                                   | Indicators/Training items covered - Burkina                                                                                                                                                                                                                          |
|--------------------|-------------------------------------------------------------|----------------------------------------------------------------------------------------------------------------------------------------------------------------------------------------------------------------------------------------------------------------------|
| Assess             | General practice                                            | Asking about hot body, the child's age/date of birth, calculation of child's age, temperature measurement, respiratory rate measurement, looking for danger signs                                                                                                    |
|                    | Proficiency in the use of RDT                               | Safety measures, labelling cassettes, pricking the correct finger, accuracy of blood volume collected, correct volume of buffer applied, blood and buffer placed in appropriate wells, wait right time before reading the test result, interpretation of the results |
| Classify           | Adherence to treatment recommendations and medicines dosage | RDT positive + ACT, RDT positive + no ACT, RDT negative + ACT, RDT negative + no ACT, when RA should be given                                                                                                                                                        |
|                    | Medication dosages                                          | Dosage of medicines to be given                                                                                                                                                                                                                                      |
| Treat and Counsel_ |                                                             | Medicine dosage explanations. Return within 48 hours if patient does not improve. Feed the child well.                                                                                                                                                               |

**Supplementary Table 5. Training tools used in the study**

| Training Documents              | Description                                                                                                                                                                                                                                                                                                                                                                                                                                                                                                                                                                                                                                                                                                                                                                                                                                                                                                                                                                                                                                                                                                                                 |
|---------------------------------|---------------------------------------------------------------------------------------------------------------------------------------------------------------------------------------------------------------------------------------------------------------------------------------------------------------------------------------------------------------------------------------------------------------------------------------------------------------------------------------------------------------------------------------------------------------------------------------------------------------------------------------------------------------------------------------------------------------------------------------------------------------------------------------------------------------------------------------------------------------------------------------------------------------------------------------------------------------------------------------------------------------------------------------------------------------------------------------------------------------------------------------------|
| Training Manuals                | Burkina Faso: 1. Training manual on the management of uncomplicated malaria designed by the investigative team based on the guideline of the National Malaria Control Programme of Burkina and the Manual of WHO for the training of CHWs.<br>2. Simplified version of the WHO Manual for pre - referral treatment with Rectal Artesunate – French version ( <a href="http://video.who.int/streaming/tdr/WHO-TRA_Malaria_rectal_artesunate_19SEPT2012_fr.wmv">http://video.who.int/streaming/tdr/WHO-TRA_Malaria_rectal_artesunate_19SEPT2012_fr.wmv</a> )<br>Nigeria: 1. Simplified versions of WHO manuals for the training of CHW on uncomplicated malaria. 2. WHO Manual for pre - referral treatment with Rectal Artesunate – English version. ( <a href="http://video.who.int/streaming/tdr/WHO-TRA_Malaria_rectal_artesunate_19SEPT2012_en.wmv">http://video.who.int/streaming/tdr/WHO-TRA_Malaria_rectal_artesunate_19SEPT2012_en.wmv</a> )<br>Uganda: 1. Simplified versions of WHO manuals for the training of CHW on uncomplicated malaria. 2. WHO Manual for pre - referral treatment with Rectal Artesunate – English Version. |
| Job Aids*                       | On the use of Rapid diagnostic test of malaria (mRDT) developed in French in Burkina Faso, Yoruba in Nigeria and Luganda and Lunyankole in Uganda, based on the job aids of FIND.                                                                                                                                                                                                                                                                                                                                                                                                                                                                                                                                                                                                                                                                                                                                                                                                                                                                                                                                                           |
| Informed Consent Form           | The three study sites (Burkina Faso, Nigeria, Uganda) used the Ethical committee approved Participant Information Sheets and the Informed Consent Forms developed for the purpose of the study.<br>The three study sites used the Case Report Forms (CRFs) developed for the purpose of the study:                                                                                                                                                                                                                                                                                                                                                                                                                                                                                                                                                                                                                                                                                                                                                                                                                                          |
| Case Report Forms               | Patient register used for uncomplicated malaria and as screening form for severe malaria<br>Pictorial Recruitment form for severe malaria (Rectal Artesunate group)                                                                                                                                                                                                                                                                                                                                                                                                                                                                                                                                                                                                                                                                                                                                                                                                                                                                                                                                                                         |
| Drugs Accountability Forms      | Two follow-up forms for patients recruited in rectal artesunate group<br>The three study sites used the rectal artesunate drug accountability forms designed for the purpose of the study (one for the central level, one form at health facility level and one form at peripheral level (CHWs). Each form was checked against CRFs to monitor drug accountability at each supervisory visit                                                                                                                                                                                                                                                                                                                                                                                                                                                                                                                                                                                                                                                                                                                                                |
| Referral Card                   | To accompany a patient being referral to the nearest health facility for patients who received rectal artesunate.<br>Burkina Faso: Two posters on Artemether - Lumefantrine dosage according to the age groups (6-36months and 36 - 59 months), one poster on the advantages of correct treatment/dosage and one on the disadvantages of incorrect treatment/dosage.                                                                                                                                                                                                                                                                                                                                                                                                                                                                                                                                                                                                                                                                                                                                                                        |
| Treatment Information Material* | Pictorials for danger signs and for the methods of Rectal Artesunate Administration<br>Nigeria: A mannequin for explaining and practice on the insertion of Rectal Artesunate.<br>Uganda: Integrated Management of Childhood Illness materials developed                                                                                                                                                                                                                                                                                                                                                                                                                                                                                                                                                                                                                                                                                                                                                                                                                                                                                    |

\*The printable materials, job aids were laminated for each CHWs for their training and for communication, sensitization of caregivers during the consultation, the community during educational talks for behavior changes.
